# Supplementary material for: Extracellular Secretomes of <i>Leptospira Interrogans</i> Serovar Icterohemorrhagiae Respond to the <i>In Vivo</i> Mimic of Physiological Osmolarity and Temperature Transition
Source: Preprints.org preprint supplement (doi:10.20944/preprints202210.0099.v1), 2022-10-09
Supplement: Supplementary file 1 [file supplementary]

**Supplementary Materials**

Table S1:Compositions of plasma and dialysis fluid. Table S2:Potential moonlighting proteins identified from *Leptospira* RGA secretomes. Table S 3:Potential virulent factors identified from *Leptospira* RGA culture supernatant.

Table S1

| **Compositions** | **Plasma** | **Dialysis fluid** |
| --- | --- | --- |
| Theoretical osmolarity (mosmol/L) | 296 | 276 |
| Bicarbonate-acetate | 24 | 38 |
| Sodium (Na+) | 142 | 138 |
| Potassium (K+) | 4 | 3 |
| Calcium (Ca+) | 2.5 | 3.5 |
| Magnesium (Mg+) | 1.0 | 1.0 |
| Chloride (Cl-) | 103 | 109.5 |
| Glucose (mmol/L) | 5-7 | 5.5 |
| pH | 7.4 | 7.7 |

Table S2

| Accession no. | Locus Tag | COG | emPAI | | Protein | | Moonlighting  function | |  |
| --- | --- | --- | --- | --- | --- | --- | --- | --- | --- |
| WP_017851519.1 | LA1879 | O | 0.07 | | Chaperone ClpB | | Metabolic process | |  |
| EMO05204.1 | LA2809 | O | 0.52 | | Peroxiredoxin | | Plasminogen binding | |  |
| OOC00378.1 | LA3705 | O | 0.10 | | DnaK/HSP70 | | Plasminogen binding | |  |
| EPG64449.1 |  | O | 0.16 | | Redoxin | | Plasminogen binding | |  |
| WP_004754792.1 | LA0313 | J | 0.17 | | Ef-G | | adhesin | |  |
| EMO26793.1 | LA0737 | J | 0.14 | | Ef-Tu | | Plasminogen binding  Fibronectin binding | |  |
| EMO28780.1 | LA3297 | J | 0.14 | | Ef-Ts | | Plasminogen binding | |  |
| EMO28561.1 | LA1240 | J | 0.09 | | Threonine-tRNA  ligase-like protein | | Promote vascular development | |  |
| WP_000551773.1 | LA0709 | L | 0.02 | | M23 metallopeptidase | | Plasminogen binding  Fibronectin binding | |  |
| EMO00242.1 | LA3456 | L | 0.02 | | Peptidase, M23 family | | Fibronectin binding | |  |
| WP_004765857.1 | LB327 | C | 0.15 | | Aconitate hydratase | | RNA-binding | |  |
| APH43078.1 | LA4171 | C | 0.06 | | Isocitrate dehydrogenase | | mRNA binding | |  |
| EMO25988.1 | LA0296 | C | 0.07 | | Crotonyl-CoA reductase | | ECM binding | |  |
| OOB94044.1 | LA2139 | C | 0.09 | | Malate dehydrogenase | | mRNA binding | |  |
| WP_020765520.1 | LA1409 | E | 0.22 | | Serine hydroxymethyltransferase | | mRNA-binding | |  |
| ALO00256.1 | LA1719 | E | 0.1 | | Cysteine synthase A | | Transcriptional regulator | |  |
| Q8EYH2 | LA4242 | E | 0.18 | | Ketol-acid reductoisomerase type1 | | Antioxidant | |  |
| WP_020766873.1 | LA1703 | G | 0.43 | | Phosphoglycerate kinase | | Plasminogen binding | |  |
| EMN49773.1 | LA353 | G | 0.06 | | Pyruvate kinase | | Adhesion | |  |
| WP_01785147.1 | LA3317 | H | 0.15 | | Dihydrofolate reductase | | RNA-binding | |  |
|  |  |  |  |  | |  | |  | |

Table S 3

| No. | Accession no. | COG | Secreted protein | Locus Tag | Protein |
| --- | --- | --- | --- | --- | --- |
| 1 | EMO00242.1 | M | No | LA3456 | Peptidase, M23 family |
| 2 | WP_000551773.1 | M | Yes | LA0709 | M23 metallopeptidase |
| 3 | ALO00286.1 | M | Yes | LA1765 | Rhs family protein |
| 4 | WP_000313035.1 | M | No |  | TolC family protein |
| 5 | EMO028805.1 | M | No |  | Efflux ABC transporter, permease protein |
| 6 | KPA32476 | N/T | Yes | LA0049 | Leucine rich repeat protein |
| 7 | ALO00811.1 | N | No |  | Endoflagella filament core protein |
| 8 | ASV09925.1 | N | No | LA4183 | Endoflagellar motor protein |
| 9 | WP_002177423.1 | N | No |  | Flagellin |
| 10 | EMO05204.1 | O | Yes | LA2809 | Peroxiredoxin |
| 11 | OOC00378.1 | O | Yes | LA3705 | Molecular chaperone DnaK |
| 12 | WP_017851519.1 | O | No | LA1879 | ATP-dependent chaperone ClpB |
| 13 | WP_00217710.1 | T | Yes |  | Methyl-accepting chemotaxis protein |
| 14 | EMN09781.1 | V | No | LA2470 | Putative lipoprotein |
| 15 | WP_082271210.1 | V | No |  | Lipoprotein |
| 16 | WP_000551773.1 | L | Yes |  | Hypothetical protein |
| 17 | gi|384115331 | C | Yes |  | succinate dehydrogenase cytochrome  subunit, 558 family |
| 18 | PQL61708.1 | C | No |  | Toxin-antitoxin system HicB famiy antitoxin |
| 19 | EMY06802.1 | E | Yes |  | Thermolysin metallopeptidase, - helical domain protein |
| 20 | WP_036025616.1 | I | Yes | LA1345 | / hydrolase |
| 21 | WP_002177513.1 | I | Yes | LA2501 | / hydrolase |
| 22 | WP_025176825.1 | I | Yes | LA0899 | MaoC family dehydratase |
| 23 | ASV05635.1 | P | Yes | LA3102 | TonB-dependent receptor |
| 24 | WP_061244535.1 | R | Yes | LA1299 | Ankyrin repeat-containing protein |
| 25 | ABJ77150.1 | R | Yes | LA0559 | Ankyrin-related protein |
